# Supplementary material
Source: publisher figshare collection journal article supplement (https://gsajournals.figshare.com/ndownloader/files/23431226)
Supplement: Supplementary file 1 [file 23431226]

## Sheet: Detailed
Chromosome	Start	End	Width	Contrast
1	155.139	155.335	0.196294	PWK, DBA2 | 129S1, AJ, B6
1	158.876	163.949	5.0726	PWK, DBA2 | 129S1, AJ, B6
1	164.671	170.089	5.41748	PWK, DBA2 | 129S1, AJ, B6
2	125.161	129.074	3.91277	PWK, DBA2 | 129S1, AJ, B6
2	130.88	131.649	0.768901	PWK, DBA2 | 129S1, AJ, B6
2	139.605	141.061	1.456	PWK, DBA2 | 129S1, AJ, B6
2	143.717	143.726	0.00932	PWK, DBA2 | 129S1, AJ, B6
2	147.864	148.336	0.472597	PWK, DBA2 | 129S1, AJ, B6
2	156.427	157.324	0.896659	PWK, DBA2 | 129S1, AJ, B6
3	120.598	122.317	1.7186	PWK, DBA2 | 129S1, AJ, B6
3	122.821	122.892	0.071004	PWK, DBA2 | 129S1, AJ, B6
4	138.008	140.159	2.15064	PWK, DBA2 | 129S1, AJ, B6
5	23.8414	24.3361	0.494681	PWK, DBA2 | 129S1, AJ, B6
5	73.9133	74.6671	0.753746	PWK, DBA2 | 129S1, AJ, B6
6	107.232	108.876	1.64433	PWK, DBA2 | 129S1, AJ, B6
6	109.154	110.21	1.05648	PWK, DBA2 | 129S1, AJ, B6
6	143.972	144.897	0.924559	PWK, DBA2 | 129S1, AJ, B6
6	145.373	146.167	0.793509	PWK, DBA2 | 129S1, AJ, B6
7	31.3937	35.4271	4.03343	PWK, DBA2 | 129S1, AJ, B6
7	36.8194	37.104	0.284614	PWK, DBA2 | 129S1, AJ, B6
7	37.4263	37.7582	0.331944	PWK, DBA2 | 129S1, AJ, B6
7	47.5237	50.9584	3.43469	PWK, DBA2 | 129S1, AJ, B6
7	51.574	51.8504	0.276385	PWK, DBA2 | 129S1, AJ, B6
7	66.4915	74.2768	7.78524	PWK, DBA2 | 129S1, AJ, B6
7	103.143	109.234	6.09138	PWK, DBA2 | 129S1, AJ, B6
7	120.036	121.378	1.34219	PWK, DBA2 | 129S1, AJ, B6
7	126.319	126.657	0.337469	PWK, DBA2 | 129S1, AJ, B6
9	32.1817	34.0876	1.90594	PWK, DBA2 | 129S1, AJ, B6
9	83.4766	85.4762	1.99959	PWK, DBA2 | 129S1, AJ, B6
10	12.7529	15.3836	2.63065	PWK, DBA2 | 129S1, AJ, B6
10	89.066	89.7108	0.644806	PWK, DBA2 | 129S1, AJ, B6
11	24.3412	24.6529	0.311697	PWK, DBA2 | 129S1, AJ, B6
11	37.0698	38.9956	1.92576	PWK, DBA2 | 129S1, AJ, B6
11	41.7803	42.996	1.21574	PWK, DBA2 | 129S1, AJ, B6
11	68.4015	72.963	4.56152	PWK, DBA2 | 129S1, AJ, B6
11	84.11	85.7581	1.64811	PWK, DBA2 | 129S1, AJ, B6
14	97.6337	99.7212	2.08754	PWK, DBA2 | 129S1, AJ, B6
16	90.5996	91.1758	0.576194	PWK, DBA2 | 129S1, AJ, B6
17	12.532	12.5505	0.018561	PWK, DBA2 | 129S1, AJ, B6
17	77.2777	78.9333	1.65568	PWK, DBA2 | 129S1, AJ, B6
17	82.9315	85.3386	2.40706	PWK, DBA2 | 129S1, AJ, B6
18	73.7139	74.3355	0.621584	PWK, DBA2 | 129S1, AJ, B6
19	16.8717	18.2818	1.41006	PWK, DBA2 | 129S1, AJ, B6
19	22.6944	25.0552	2.36083	PWK, DBA2 | 129S1, AJ, B6
1	126.438	126.644	0.206573	PWK, AJ, B6 | DBA2, 129S1
5	22.3584	23.7338	1.37534	PWK, AJ, B6 | DBA2, 129S1
8	71.597	75.103	3.50595	PWK, AJ, B6 | DBA2, 129S1
8	90.8201	95.266	4.44586	PWK, AJ, B6 | DBA2, 129S1
12	104.905	105.295	0.389535	PWK, AJ, B6 | DBA2, 129S1
12	105.494	105.667	0.173771	PWK, AJ, B6 | DBA2, 129S1
14	109.783	111.689	1.90626	PWK, AJ, B6 | DBA2, 129S1
2	143.726	145.677	1.95069	AJ, B6 | PWK, 129S1, DBA2
2	147.627	147.864	0.23668	AJ, B6 | PWK, 129S1, DBA2
4	140.159	141.023	0.864243	AJ, B6 | PWK, 129S1, DBA2
4	142.613	147.539	4.92643	AJ, B6 | PWK, 129S1, DBA2
7	16.8651	17.2274	0.362311	AJ, B6 | PWK, 129S1, DBA2
7	52.7856	53.3531	0.567513	AJ, B6 | PWK, 129S1, DBA2
7	122.314	123.281	0.966684	AJ, B6 | PWK, 129S1, DBA2
7	124.927	126.319	1.39221	AJ, B6 | PWK, 129S1, DBA2
13	118.36	118.733	0.372663	AJ, B6 | PWK, 129S1, DBA2
14	11.4315	20.1513	8.71983	AJ, B6 | PWK, 129S1, DBA2
14	69.0081	69.4095	0.401457	AJ, B6 | PWK, 129S1, DBA2
14	92.7552	93.0888	0.333573	AJ, B6 | PWK, 129S1, DBA2
14	93.5933	93.6478	0.054525	AJ, B6 | PWK, 129S1, DBA2
14	111.69	111.881	0.190798	AJ, B6 | PWK, 129S1, DBA2
1	126.644	126.786	0.141191	129S1 | PWK, AJ, B6, DBA2
1	187.091	187.777	0.686453	129S1 | PWK, AJ, B6, DBA2
2	119.893	120.511	0.61829	129S1 | PWK, AJ, B6, DBA2
2	154.54	156.426	1.88555	129S1 | PWK, AJ, B6, DBA2
4	135.367	135.981	0.61459	129S1 | PWK, AJ, B6, DBA2
6	137.615	138.355	0.739835	129S1 | PWK, AJ, B6, DBA2
9	50.2883	51.271	0.982667	129S1 | PWK, AJ, B6, DBA2
14	37.5863	38.17	0.583656	129S1 | PWK, AJ, B6, DBA2
14	104.493	105.308	0.814682	129S1 | PWK, AJ, B6, DBA2
